# Supplementary material
Source: bioRxiv or medRxiv preprint supplement (http://medrxiv.stage.highwire.org/highwire/filestream/84993/field_highwire_adjunct_files/0/2020.06.08.20115683-1.pdf)
Supplement: Supplementary file [file 2020.06.08.20115683-1.pdf]

# **Adverse Outcomes and Mortality in Users of Non-Steroidal Anti-Inflammatory Drugs tested positive for SARS-CoV-2: A Danish Nationwide Cohort Study**

## **Online Supplementary Material**

**Table S1** Univariate association with death (RRcd) and use of NSAIDs (RRce) for each covariate in the propensity score

**Table S2** Association between current NSAID use and mortality, intensive care unit admission, mechanical ventilation, renal replacement therapy and hospitalisation using an outcome assessment window for death of 60 days and 30 days for secondary outcomes.

**Table S3** Association between use of NSAIDs within 60 days before cohort entry and 30-day mortality, intensive care unit admission, mechanical ventilation, renal replacement therapy and hospitalisation

**Table S4** Association between NSAID prescription fills within 60 days to 14 days before cohort entry and 30-day mortality, intensive care unit admission, mechanical ventilation, renal replacement therapy and hospitalisation

**Appendix A** Codes used to define exposure, outcome, and covariate variables

**Table S1** Univariate association with death (RRcd) and use of NSAIDs (RRce) for each covariate in the propensity score

| Covariate                     | RR(ce)           | RR(cd)            |
|-------------------------------|------------------|-------------------|
| Prescription drug use         |                  |                   |
| Antihypertensives             | 0.93 (0.67-1.30) | 1.44 (1.14-1.80)  |
| Antidiabetic drugs            | 1.22 (0.79-1.86) | 1.60 (1.24-2.08)  |
| Low-dose aspirin              | 0.85 (0.50-1.45) | 1.22 (0.94-1.59)  |
| Immunosuppressants            | 1.54 (0.48-4.94) | 1.49 (0.63-3.51)  |
| Opioids                       | 2.38 (1.72-3.30) | 2.18 (1.75-2.73)  |
| Benzodiazepines               | 0.86 (0.42-1.77) | 2.70 (1.90-3.84)  |
| Z-drugs                       | 0.78 (0.41-1.50) | 1.60 (1.16-2.20)  |
| 1st gen. antipsychotics       | 0.52 (0.07-3.78) | 3.53 (1.74-7.13)  |
| 2nd generation antipsychotics | 0.40 (0.13-1.27) | 3.52 (2.38-5.21)  |
| Systemic glucocorticoids      | 1.40 (0.86-2.28) | 1.73 (1.28-2.33)  |
| Inhaled corticosteroids       | 1.52 (1.01-2.29) | 1.41 (1.02-1.96)  |
| Prior diagnoses               |                  |                   |
| Asthma                        | 0.94 (0.56-1.57) | 1.15 (0.76-1.73)  |
| COPD                          | 0.83 (0.44-1.56) | 1.80 (1.36-2.38)  |
| Cardiovascular disease        | 0.57 (0.37-0.87) | 1.42 (1.15-1.75)  |
| Stroke                        | 0.63 (0.31-1.25) | 1.15 (0.86-1.52)  |
| Chronic kidney disease        | 0.23 (0.03-1.65) | 2.67 (1.68-4.24)  |
| Liver disease                 | 1.05 (0.39-2.88) | 2.49 (1.33-4.66)  |
| Alcohol related disorders     | 0.70 (0.29-1.72) | 2.20 (1.43-3.39)  |
| Dementia                      | 0.33 (0.08-1.34) | 1.66 (1.15-2.42)  |
| Cancer                        | 0.96 (0.60-1.53) | 1.37 (1.06-1.75)  |
| Overweight or obesity         | 1.55 (1.06-2.27) | 1.52 (1.08-2.16)  |
| Hemiplegia and paraplegia     | 0.91 (0.12-6.71) | 6.99 (2.65-18.42) |
| Osteoarthritis                | 1.49 (1.05-2.11) | 1.01 (0.80-1.27)  |
| Rheumatoid arthritis          | 1.82 (1.09-3.04) | 1.11 (0.76-1.64)  |
| Dysmenorrhoea                 | 4.32 (1.94-9.63) | -                 |

**Table S2** Association between current NSAID use and mortality, intensive care unit admission, mechanical ventilation, renal replacement therapy and hospitalisation using an outcome assessment window for death of 60 days 30 days for secondary outcomes

| Unmatched cohort            |         |                  |           |                  |                     |                  |
|-----------------------------|---------|------------------|-----------|------------------|---------------------|------------------|
| Outcome                     | Treated |                  | Untreated |                  | Comparison          |                  |
|                             | Events  | Risk (%)         | Events    | Risk (%)         | Risk difference (%) | Risk ratio       |
| Death                       | 14/248  | 5.6 (2.8-8.5)    | 564/8988  | 6.3 (5.8-6.8)    | -0.6 (-3.5-2.3)     | 0.90 (0.54-1.51) |
| Hospitalisation**           | 57/228  | 25.0 (19.4-30.6) | 1512/8414 | 18.0 (17.1-18.8) | 7.0 (1.3-12.7)      | 1.39 (1.11-1.75) |
| ICU-admission**             | 12/247  | 4.9 (2.2-7.5)    | 291/8956  | 3.2 (2.9-3.6)    | 1.6 (-1.1-4.3)      | 1.50 (0.85-2.63) |
| Mechanical ventilation**    | 10/248  | 4.0 (1.6-6.5)    | 232/8970  | 2.6 (2.3-2.9)    | 1.4 (-1.0-3.9)      | 1.56 (0.84-2.90) |
| Renal replacement therapy** | n<5/248 | -***             | -***      | -***             | 0.4 (-1.0-1.8)      | 1.49 (0.47-4.69) |
| Matched cohort              |         |                  |           |                  |                     |                  |
| Outcome                     | Treated |                  | Untreated |                  | Comparison          |                  |
|                             | Events  | Risk (%)         | Events    | Risk (%)         | Risk difference (%) | Risk ratio       |
| Death                       | 14/224  | 6.3 (3.1-9.4)    | 62/896    | 6.9 (5.1-8.7)    | -0.7 (-4.3-3.0)     | 0.90 (0.51-1.60) |
| Hospitalisation             | 50/204  | 24.5 (18.6-30.4) | 183/826   | 22.2 (19.0-25.3) | 2.4 (-4.3-9.1)      | 1.11 (0.84-1.46) |
| ICU-admission               | 12/223  | 5.4 (2.4-8.3)    | 42/889    | 4.7 (3.2-6.2)    | 0.7 (-2.7-4.0)      | 1.14 (0.60-2.16) |
| Mechanical ventilation      | 10/224  | 4.5 (1.8-7.2)    | 35/891    | 3.9 (2.5-5.3)    | 0.5 (-2.5-3.6)      | 1.14 (0.56-2.30) |
| Renal replacement therapy   | n<5/224 | -***             | -***      | -***             | -0.3 (-2.1-1.5)     | 0.80 (0.22-2.85) |

\*NSAID use was defined as a filled prescription within 30 days prior to the date cohort entry.

\*\* Patients with a secondary outcome occurring during the outcome assessment window were excluded, resulting in exclusion of n=594 patients for hospitalisation, n=33 for ICU-admission, n=18 for mechanical ventilation, and n=6 for renal replacement therapy.

\*\*\* Censored to preserve anonymity for counts n<5

**Table S3** Association between use of NSAIDs within 60 days before cohort entry and 30-day mortality, intensive care unit admission, mechanical ventilation, renal replacement therapy and hospitalisation

| Unmatched cohort            |         |                  |           |                  |                     |                  |
|-----------------------------|---------|------------------|-----------|------------------|---------------------|------------------|
| Outcome                     | Treated |                  | Untreated |                  | Comparison          |                  |
|                             | Events  | Risk (%)         | Events    | Risk (%)         | Risk difference (%) | Risk ratio       |
| Death                       | 24/445  | 5.4 (3.3-7.5)    | 511/8791  | 5.8 (5.3-6.3)    | -0.4 (-2.6-1.7)     | 0.93 (0.62-1.38) |
| Hospitalisation**           | 90/406  | 22.2 (18.1-26.2) | 1422/8236 | 17.3 (16.4-18.1) | 4.9 (0.8-9.0)       | 1.28 (1.06-1.55) |
| ICU-admission**             | 20/443  | 4.5 (2.6-6.5)    | 270/8760  | 3.1 (2.7-3.4)    | 1.4 (-0.5-3.4)      | 1.46 (0.94-2.28) |
| Mechanical ventilation**    | 17/444  | 3.8 (2.0-5.6)    | 218/8774  | 2.5 (2.2-2.8)    | 1.3 (-0.5-3.2)      | 1.54 (0.95-2.50) |
| Renal replacement therapy** | n<5/445 | ***              | ***       | ***              | 0.3 (-0.6-1.1)      | 1.39 (0.50-3.80) |
| Matched cohort              |         |                  |           |                  |                     |                  |
| Outcome                     | Treated |                  | Untreated |                  | Comparison          |                  |
|                             | Events  | Risk (%)         | Events    | Risk (%)         | Risk difference (%) | Risk ratio       |
| Death                       | 21/402  | 5.2 (3.0-7.4)    | 83/1608   | 5.2 (4.0-6.3)    | 0.1 (-2.4-2.5)      | 1.01 (0.63-1.63) |
| Hospitalisation             | 79/370  | 21.4 (17.2-25.5) | 261/1493  | 17.5 (15.2-19.7) | 3.9 (-0.9-8.6)      | 1.22 (0.97-1.54) |
| ICU-admission               | 19/400  | 4.7 (2.7-6.8)    | 62/1598   | 3.9 (2.8-4.9)    | 0.9 (-1.5-3.2)      | 1.22 (0.73-2.05) |
| Mechanical ventilation      | 16/401  | 4.0 (2.1-5.9)    | 52/1603   | 3.2 (2.3-4.2)    | 0.7 (-1.4-2.9)      | 1.23 (0.70-2.16) |
| Renal replacement therapy   | n<5/402 | ***              | ***       | ***              | 0.1 (-1.1-1.2)      | 1.07 (0.34-3.34) |

\*NSAID use was defined as a filled prescription within 60 days prior to the date cohort entry.

\*\* Patients with a secondary outcome occurring during the outcome assessment window were excluded, resulting in exclusion of n=594 patients for hospitalisation, n=33 for ICU-admission, n=18 for mechanical ventilation, and n=6 for renal replacement therapy.

\*\*\* Censored to preserve anonymity for counts n<5

**Table S4** Association between NSAID prescription fills within 60 days to 14 days before cohort entry and 30-day mortality, intensive care unit admission, mechanical ventilation, renal replacement therapy and hospitalisation

| Unmatched cohort            |         |                  |           |                  |                     |                  |
|-----------------------------|---------|------------------|-----------|------------------|---------------------|------------------|
| Outcome                     | Treated |                  | Untreated |                  | Comparison          |                  |
|                             | Events  | Risk (%)         | Events    | Risk (%)         | Risk difference (%) | Risk ratio       |
| Death                       | 17/350  | 4.9 (2.6-7.1)    | 518/8886  | 5.8 (5.3-6.3)    | -1.0 (-3.3-1.3)     | 0.83 (0.52-1.33) |
| Hospitalisation**           | 67/319  | 21.0 (16.5-25.5) | 1445/8323 | 17.4 (16.5-18.2) | 3.6 (-0.9-8.2)      | 1.21 (0.97-1.50) |
| ICU-admission**             | 16/348  | 4.6 (2.4-6.8)    | 274/8855  | 3.1 (2.7-3.5)    | 1.5 (-0.7-3.7)      | 1.49 (0.91-2.43) |
| Mechanical ventilation**    | 13/349  | 3.7 (1.7-5.7)    | 222/8869  | 2.5 (2.2-2.8)    | 1.2 (-0.8-3.2)      | 1.49 (0.86-2.58) |
| Renal replacement therapy** | n<5/350 | -***             | -***      | -***             | 0.2 (-0.8-1.2)      | 1.31 (0.41-4.17) |
| Matched cohort              |         |                  |           |                  |                     |                  |
| Outcome                     | Treated |                  | Untreated |                  | Comparison          |                  |
|                             | Events  | Risk (%)         | Events    | Risk (%)         | Risk difference (%) | Risk ratio       |
| Death                       | 14/312  | 4.5 (2.2-6.8)    | 74/1248   | 5.9 (4.6-7.3)    | -1.4 (-4.1-1.2)     | 0.76 (0.43-1.33) |
| Hospitalisation             | 60/287  | 20.9 (16.2-25.6) | 191/1158  | 16.5 (14.2-18.8) | 4.4 (-0.8-9.7)      | 1.27 (0.97-1.65) |
| ICU-admission               | 15/310  | 4.8 (2.4-7.2)    | 50/1241   | 4.0 (2.8-5.2)    | 0.8 (-1.9-3.5)      | 1.20 (0.68-2.13) |
| Mechanical ventilation      | 12/311  | 3.9 (1.7-6.0)    | 42/1244   | 3.4 (2.3-4.5)    | 0.5 (-1.9-2.9)      | 1.14 (0.60-2.17) |
| Renal replacement therapy   | n<5/312 | -***             | -***      | -***             | -0.1 (-1.3-1.2)     | 0.92 (0.26-3.33) |

\*NSAID use was defined as a filled prescription within 60 days to 14 days prior to the date cohort entry.

\*\* Patients with a secondary outcome occurring during the outcome assessment window were excluded, resulting in exclusion of n=594 patients for hospitalisation, n=33 for ICU-admission, n=18 for mechanical ventilation, and n=6 for renal replacement therapy.

\*\*\* Censored to preserve anonymity for counts n<5

## APPENDIX A

| VARIABLE                                                      | CODING SYSTEM | CODE                                                                                                    |
|---------------------------------------------------------------|---------------|---------------------------------------------------------------------------------------------------------|
| <i>Exposures</i>                                              |               |                                                                                                         |
| NSAID                                                         | ATC           | M01A (excluding M01AX)                                                                                  |
| <i>Prescription drug use</i>                                  |               |                                                                                                         |
| Antihypertensives                                             | ATC           | C08, C03CA, C07, C09                                                                                    |
| Antidiabetic drugs                                            | ATC           | A10                                                                                                     |
| Low-dose aspirin                                              | ATC           | B01AC06, B01AC30, N02BA01                                                                               |
| Immunosuppressants                                            | ATC           | L04                                                                                                     |
| Opioids                                                       | ATC           | N02A                                                                                                    |
| Benzodiazepines                                               | ATC           | N05BA, N05CD                                                                                            |
| Z-drugs (Non-benzodiazepine benzodiazepine receptor agonists) | ATC           | N05CF                                                                                                   |
| 1st gen. antipsychotics                                       | ATC           | N05AA, N05AB, N05AC, N05AD, N05AF, N05AG, N05AL01                                                       |
| 2nd gen. antipsychotics                                       | ATC           | N05AE, N05AH, N05AX, N05AL05                                                                            |
| Systemic glucocorticoids                                      | ATC           | H02AB                                                                                                   |
| Inhaled corticosteroids                                       | ATC           | R03BA01-09, R03AK06-08, R03AK10, R03AK11                                                                |
| <i>History of</i>                                             |               |                                                                                                         |
| Asthma                                                        | ICD-10        | J45, J46                                                                                                |
| Chronic obstructive pulmonary disease                         | ICD-10        | J41-J44                                                                                                 |
| Cardiovascular disease                                        | ICD-10        | I20-I25, I47-I50                                                                                        |
| Ischaemic stroke                                              | ICD-10        | I63, I64                                                                                                |
| Chronic kidney disease                                        | ICD-10        | N00, N01, N03-N06, N08.8, N14.1, N14.2, N16.8, N17, N25.1, N26, N27                                     |
| Liver disease                                                 | ICD-10        | B18, K70.0- K70.3, K709, K71, K73, K74, K76.0, B15.0, B16.0, B16.2, B19.0, K70.4, K72, K76.6, I85       |
| Alcohol related disorders                                     | ICD-10        | F10, E24.4, G31.2, G62.1, G72.1, I42.6, K29.2, K70, K85.2, K86.0, Q86.0, Z50.2, Z71.4, Z72.1            |
| Dementia                                                      | ICD-10        | F01-F04                                                                                                 |
| Cancer                                                        | ICD-10        | C00-C97, excluding C44                                                                                  |
| Overweight or obesity                                         | ICD-10        | E66                                                                                                     |
| Hemiplegia and paraplegia                                     | ICD-10        | G04.1, G11.4, G80.1, G80.2, G83.0-G83.4, G83.9                                                          |
| Osteoarthritis                                                | ICD-10        | M15-19                                                                                                  |
| Rheumatoid arthritis/collagen vascular disorders              | ICD-10        | L94.0, L94.1, L94.3, M05, M06, M08, M12.0, M12.3, M30, M31.0 - M31.3, M32-M35, M45, M46.1, M46.8, M46.9 |
| Dysmenorrhoea                                                 | ICD-10        | N94.4-94.6                                                                                              |
| <i>Other</i>                                                  |               |                                                                                                         |

|                                  |               |                                                                                                                                                                                                                                                                                                                   |
|----------------------------------|---------------|-------------------------------------------------------------------------------------------------------------------------------------------------------------------------------------------------------------------------------------------------------------------------------------------------------------------|
| Phase of the outbreak            | Calendar time | An indicator variable for whether the patient was tested before or after March 12, 2020 where the strategy changed from focusing on containment with contact tracing and testing to a mitigation strategy prioritizing testing of patients with severe symptoms, admitted patients, and health care professionals |
| <i>Outcomes</i>                  |               |                                                                                                                                                                                                                                                                                                                   |
| Admission to intensive care unit | SKS           | NABB, NABE                                                                                                                                                                                                                                                                                                        |
| Mechanical ventilation           | SKS           | BGDA                                                                                                                                                                                                                                                                                                              |
| Acute renal replacement therapy  | SKS           | BJFD0                                                                                                                                                                                                                                                                                                             |

| REGISTRY                                                               | CITATION                                              | INFORMATION OBTAINED                                                         | VARIABLES                                                                                                     |
|------------------------------------------------------------------------|-------------------------------------------------------|------------------------------------------------------------------------------|---------------------------------------------------------------------------------------------------------------|
| Danish National Prescription Registry (Lægemiddelstatistik registeret) | Pottegård et al<br>(doi:10.1093/ije/dyw213)           | All redeemed prescriptions from community pharmacies in the period 1995-2018 | ATC-code, fill date                                                                                           |
| Danish National Patient Registry (Landspatientregisteret)              | Schmidt et al<br>(doi:10.2147/CLEP.S91125)            | In- and outpatient hospital diagnoses in the period 1977-2018                | ICD-10 code, admission date, intensive care unit admission, mechanical ventilation, renal replacement therapy |
| Civil Registration System (CPR-registeret)                             | Schmidt et al<br>(doi:10.2147/CLEP.S179083)           | Age, sex, migration- and vital status                                        |                                                                                                               |
| The Danish Register of Causes of Death                                 | Helweg-Larsen et al<br>(doi:10.1177/1403494811399958) | Date of death                                                                | Date of death                                                                                                 |
